# Supplementary material
Source: publisher site journal article supplement (https://www.spandidos-publications.com/3140/downloadSupplementary)

Figure S1. FoxJ2 knockdown efficiencies in FoxJ2 shRNA transfected MDA-MB-231 breast cancer cells. (A) Expression levels of FoxJ2 (A) mRNA and (B) protein in shFoxJ2-transfected MDA-MB-231 cells, as well as the scramble control shRNA-transfected cells, were detected by reverse transcription-quantitative PCR and by western blotting, respectively. \* $P < 0.05$  vs. Scramble. FoxJ2, forkhead box J2; sh, short hairpin RNA.

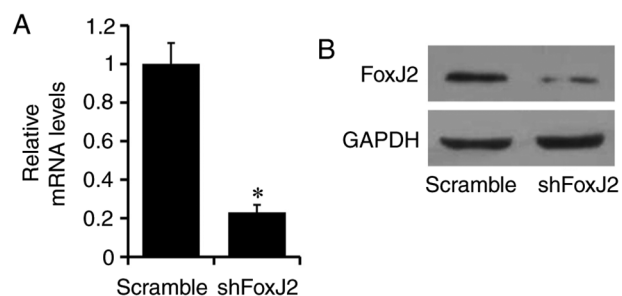

Supplement: Supplementary file 1 [file downloadSupplementary]
